# Supplementary material
Source: ML conference proceedings conference paper supplement (https://aclanthology.org/D17-1263)
Supplement: Attachment [file D17-1263.Attachment.zip]

# A Challenge Set Approach to Evaluating Machine Translation (Appendices)

**Pierre Isabelle and Colin Cherry**  
National Research Council Canada  
first.last@nrc-cnrc.gc.ca

**George Foster**  
Google\*  
fosterg@google.com

## A Instructions to Annotators

The following instructions were provided to annotators:

*You will be presented with 108 short English sentences and the French translations produced for them by each of four different machine translation systems. You will not be asked to provide an overall rating for the machine-translated sentences. Rather, you will be asked to determine whether or not a highly specific aspect of the English sentence is correctly rendered in each of the different translations. Each English sentence will be accompanied with a yes-no question which precisely specifies the targeted element for the associated translations. For example, you may be asked to determine whether or not the main verb phrase of the translation is in correct grammatical agreement with its subject.*

*In order to facilitate this process, each English sentence will also be provided with a French reference (human) translation in which the particular elements that support a yes answer (in our example, the correctly agreeing verb phrase) will be highlighted. Your answer should be “yes” if the question can be answered positively and “no” otherwise. Note that this means that any translation error which is unrelated to the question at hand should be disregarded. Using the same example: as long as the verb phrase agrees correctly with its subject, it does not matter whether or not the verb is correctly chosen, is in the right tense, etc. And of course, it does not matter if unrelated parts of the translation are wrong.*

*In most cases you should be able to quickly determine a positive or negative answer. However, there may be cases in which the system has come up with a translation that just does not contain the phenomenon targeted by the associated question.*

*In such cases, and only in such cases, you should choose “not applicable” regardless of whether or not the translation is correct.*

## B Challenge Set

We include a rendering of our challenge set in the pages that follow, along with system output for the PBMT-1, NMT and Google systems. Sentences are grouped by linguistic category and subcategory. For convenience, we also include a reference translation, which is a manually-crafted translation that is designed to be the most straightforward solution to the divergence problem at hand. Needless to say, this reference translation is seldom the only acceptable solution to the targeted divergence problem. Our judges were provided these references, but were instructed to use their knowledge of French to judge whether the divergence was correctly bridged, regardless of the translation’s similarity to the reference.

In all translations, the locus of the targeted divergence is highlighted in boldface and it is specifically on that portion that our annotators were asked to provide a judgment. For each system output, we provide a summary of our annotator’s judgments on its handling of the phenomenon of interest. We label the translation with a ✓ if two or more annotators judged the divergence to be correctly bridged, and with an ✗ otherwise.

We also release a machine-readable version of this same data, including all of the individual judgments, in the hope that others will find interesting new uses for it.

---

\*Work performed while at NRC.

## Morpho-Syntactic

### S-V agreement, across distractors

Is subject-verb agreement correct? (Possible interference from distractors between the subject's head and the verb).

|     |        |                                                                                |
|-----|--------|--------------------------------------------------------------------------------|
| S1a | Source | The repeated calls from his mother <b>should</b> have alerted us.              |
|     | Ref    | Les appels répétés de sa mère <b>auraient</b> dû nous alerter.                 |
|     | PBMT-1 | Les appels répétés de sa mère aurait dû nous a alertés. ✗                      |
|     | NMT    | Les appels répétés de sa mère devraient nous avoir alertés. ✓                  |
|     | Google | Les appels répétés de sa mère auraient dû nous alerter. ✓                      |
| S1b | Source | The sudden noise in the upper rooms <b>should</b> have alerted us.             |
|     | Ref    | Le bruit soudain dans les chambres supérieures <b>aurait</b> dû nous alerter.  |
|     | PBMT-1 | Le bruit soudain dans les chambres supérieures auraient dû nous a alertés. ✗   |
|     | NMT    | Le bruit soudain dans les chambres supérieures devrait nous avoir alerté. ✓    |
|     | Google | Le bruit soudain dans les chambres supérieures devrait nous avoir alerté. ✓    |
| S1c | Source | Their repeated failures to report the problem <b>should</b> have alerted us.   |
|     | Ref    | Leurs échecs répétés à signaler le problème <b>auraient</b> dû nous alerter.   |
|     | PBMT-1 | Leurs échecs répétés de signaler le problème aurait dû nous a alertés. ✗       |
|     | NMT    | Leurs échecs répétés pour signaler le problème devraient nous avoir alertés. ✓ |
|     | Google | Leur échec répété à signaler le problème aurait dû nous alerter. ✓             |

### S-V agreement, through control verbs

Does the flagged adjective agree correctly with its subject? (Subject-control versus object-control verbs).

|     |        |                                                                             |
|-----|--------|-----------------------------------------------------------------------------|
| S2a | Source | She asked her brother not to be <b>arrogant</b> .                           |
|     | Ref    | Elle a demandé à son frère de ne pas se montrer <b>arrogant</b> .           |
|     | PBMT-1 | Elle a demandé à son frère de ne pas être arrogant. ✓                       |
|     | NMT    | Elle a demandé à son frère de ne pas être arrogant. ✓                       |
|     | Google | Elle a demandé à son frère de ne pas être arrogant. ✓                       |
| S2b | Source | She promised her brother not to be <b>arrogant</b> .                        |
|     | Ref    | Elle a promis à son frère de ne pas être <b>arrogante</b> .                 |
|     | PBMT-1 | Elle a promis son frère à ne pas être arrogant. ✗                           |
|     | NMT    | Elle a promis à son frère de ne pas être arrogant. ✗                        |
|     | Google | Elle a promis à son frère de ne pas être arrogant. ✗                        |
| S2c | Source | She promised her doctor to remain <b>active</b> after retiring.             |
|     | Ref    | Elle a promis à son médecin de demeurer <b>active</b> après s'être retirée. |
|     | PBMT-1 | Elle a promis son médecin pour demeurer actif après sa retraite. ✗          |
|     | NMT    | Elle a promis à son médecin de rester actif après sa retraite. ✗            |
|     | Google | Elle a promis à son médecin de rester actif après sa retraite. ✗            |
| S2d | Source | My mother promised my father to be more <b>prudent</b> on the road.         |
|     | Ref    | Ma mère a promis à mon père d'être plus <b>prudente</b> sur la route.       |
|     | PBMT-1 | Ma mère, mon père a promis d'être plus prudent sur la route. ✗              |
|     | NMT    | Ma mère a promis à mon père d'être plus prudent sur la route. ✗             |
|     | Google | Ma mère a promis à mon père d'être plus prudent sur la route. ✗             |

### S-V agreement, coordinated targets

Do the marked verbs/adjective agree correctly with their subject? (Agreement distribution over coordinated predicates)

|     |        |                                                                               |
|-----|--------|-------------------------------------------------------------------------------|
| S3a | Source | The woman was very <b>tall</b> and extremely <b>strong</b> .                  |
|     | Ref    | La femme était très <b>grande</b> et extrêmement <b>forte</b> .               |
|     | PBMT-1 | La femme était très gentil et extrêmement forte. ✗                            |
|     | NMT    | La femme était très haute et extrêmement forte. ✓                             |
|     | Google | La femme était très grande et extrêmement forte. ✓                            |
| S3b | Source | Their politicians were more <b>ignorant</b> than <b>stupid</b> .              |
|     | Ref    | Leurs politiciens étaient plus <b>ignorants</b> que <b>stupides</b> .         |
|     | PBMT-1 | Les politiciens étaient plus ignorants que stupide. ✗                         |
|     | NMT    | Leurs politiciens étaient plus ignorants que stupides. ✓                      |
|     | Google | Leurs politiciens étaient plus ignorants que stupides. ✓                      |
| S3c | Source | We <b>shouted</b> an insult and <b>left</b> abruptly.                         |
|     | Ref    | Nous <b>avons</b> lancé une insulte et nous <b>sommes</b> partis brusquement. |
|     | PBMT-1 | Nous avons crié une insulte et a quitté abruptement. ✗                        |
|     | NMT    | Nous avons crié une insulte et nous avons laissé brusquement. ✓               |
|     | Google | Nous avons crié une insulte et nous sommes partis brusquement. ✓              |

### S-V agreement, feature calculus on coordinated source

Do the marked verbs/adjective agree correctly with their subject? (Masculine singular ET masculine singular yields masculine plural).

|      |        |                                                                |
|------|--------|----------------------------------------------------------------|
| S4a1 | Source | The cat and the dog <b>should</b> be <b>watched</b> .          |
|      | Ref    | Le chat et le chien <b>devraient</b> être <b>surveillés</b> .  |
|      | PBMT-1 | Le chat et le chien doit être regardée. ✗                      |
|      | NMT    | Le chat et le chien doivent être regardés. ✓                   |
|      | Google | Le chat et le chien doivent être surveillés. ✓                 |
| S4a2 | Source | My father and my brother <b>will</b> be <b>happy</b> tomorrow. |
|      | Ref    | Mon père et mon frère <b>seront</b> <b>heureux</b> demain.     |
|      | PBMT-1 | Mon père et mon frère sera heureux de demain. ✗                |
|      | NMT    | Mon père et mon frère seront heureux demain. ✓                 |
|      | Google | Mon père et mon frère seront heureux demain. ✓                 |
| S4a3 | Source | My book and my pencil <b>could</b> be <b>stolen</b> .          |
|      | Ref    | Mon livre et mon crayon <b>pourraient</b> être <b>volés</b> .  |
|      | PBMT-1 | Mon livre et mon crayon pourrait être volé. ✗                  |
|      | NMT    | Mon livre et mon crayon pourraient être volés. ✓               |
|      | Google | Mon livre et mon crayon pourraient être volés. ✓               |

Do the marked verbs/adjectives agree correctly with their subject? (Feminine singular ET feminine singular yields feminine plural).

|      |        |                                                            |
|------|--------|------------------------------------------------------------|
| S4b1 | Source | The cow and the hen <b>must</b> be <b>fed</b> .            |
|      | Ref    | La vache et la poule <b>doivent</b> être <b>nourries</b> . |
|      | PBMT-1 | La vache et de la poule doivent être nourris. ✗            |
|      | NMT    | La vache et la poule doivent être alimentées. ✓            |
|      | Google | La vache et la poule doivent être nourries. ✓              |

|                                                                                                                                       |        |                                                                                      |
|---------------------------------------------------------------------------------------------------------------------------------------|--------|--------------------------------------------------------------------------------------|
| S4b2                                                                                                                                  | Source | My mother and my sister <b>will be happy</b> tomorrow.                               |
|                                                                                                                                       | Ref    | Ma mère et ma sœur <b>seront heureuses</b> demain.                                   |
|                                                                                                                                       | PBMT-1 | Ma mère et ma sœur sera heureux de demain. ✗                                         |
|                                                                                                                                       | NMT    | Ma mère et ma sœur seront heureuses demain. ✓                                        |
|                                                                                                                                       | Google | Ma mère et ma sœur seront heureuses demain. ✓                                        |
| S4b3                                                                                                                                  | Source | My shoes and my socks <b>will be found</b> .                                         |
|                                                                                                                                       | Ref    | Mes chaussures et mes chaussettes <b>seront retrouvées</b> .                         |
|                                                                                                                                       | PBMT-1 | Mes chaussures et mes chaussettes sera trouvé. ✗                                     |
|                                                                                                                                       | NMT    | Mes chaussures et mes chaussettes seront trouvées. ✓                                 |
|                                                                                                                                       | Google | Mes chaussures et mes chaussettes seront trouvées. ✓                                 |
| Do the marked verbs/adjectives agree correctly with their subject? (Masculine singular ET feminine singular yields masculine plural.) |        |                                                                                      |
| S4c1                                                                                                                                  | Source | The dog and the cow <b>are nervous</b> .                                             |
|                                                                                                                                       | Ref    | Le chien et la vache <b>sont nerveux</b> .                                           |
|                                                                                                                                       | PBMT-1 | Le chien et la vache sont nerveux. ✓                                                 |
|                                                                                                                                       | NMT    | Le chien et la vache sont nerveux. ✓                                                 |
|                                                                                                                                       | Google | Le chien et la vache sont nerveux. ✓                                                 |
| S4c2                                                                                                                                  | Source | My father and my mother will be happy tomorrow.                                      |
|                                                                                                                                       | Ref    | Mon père et ma mère <b>seront heureux</b> demain.                                    |
|                                                                                                                                       | PBMT-1 | Mon père et ma mère se fera un plaisir de demain. ✗                                  |
|                                                                                                                                       | NMT    | Mon père et ma mère seront heureux demain. ✓                                         |
|                                                                                                                                       | Google | Mon père et ma mère seront heureux demain. ✓                                         |
| S4c3                                                                                                                                  | Source | My refrigerator and my kitchen table <b>were stolen</b> .                            |
|                                                                                                                                       | Ref    | Mon réfrigérateur et ma table de cuisine <b>ont été volés</b> .                      |
|                                                                                                                                       | PBMT-1 | Mon réfrigérateur et ma table de cuisine ont été volés. ✓                            |
|                                                                                                                                       | NMT    | Mon réfrigérateur et ma table de cuisine ont été volés. ✓                            |
|                                                                                                                                       | Google | Mon réfrigérateur et ma table de cuisine ont été volés. ✓                            |
| Do the marked verbs/adjectives agree correctly with their subject? (Smallest coordinated grammatical person wins.)                    |        |                                                                                      |
| S4d1                                                                                                                                  | Source | Paul and I <b>could</b> easily be <b>convinced</b> to join you.                      |
|                                                                                                                                       | Ref    | Paul et moi <b>pourrions</b> facilement être <b>convaincus</b> de se joindre à vous. |
|                                                                                                                                       | PBMT-1 | Paul et je pourrais facilement être persuadée de se joindre à vous. ✗                |
|                                                                                                                                       | NMT    | Paul et moi avons facilement pu être convaincus de vous rejoindre. ✓                 |
|                                                                                                                                       | Google | Paul et moi pourrait facilement être convaincu de vous rejoindre. ✗                  |
| S4d2                                                                                                                                  | Source | You and he <b>could</b> be <b>surprised</b> by her findings.                         |
|                                                                                                                                       | Ref    | Vous et lui <b>pourriez</b> être <b>surpris</b> par ses découvertes.                 |
|                                                                                                                                       | PBMT-1 | Vous et qu'il pouvait être surpris par ses conclusions. ✗                            |
|                                                                                                                                       | NMT    | Vous et lui pourriez être surpris par ses conclusions. ✓                             |
|                                                                                                                                       | Google | Vous et lui pourrait être surpris par ses découvertes. ✗                             |

|      |        |                                                             |
|------|--------|-------------------------------------------------------------|
| S4d3 | Source | We and they <b>are</b> on different courses.                |
|      | Ref    | Nous et eux <b>sommes</b> sur des trajectoires différentes. |
|      | PBMT-1 | Nous et ils sont en cours de différents. ✗                  |
|      | NMT    | Nous et nous sommes sur des parcours différents. ✗          |
|      | Google | Nous et ils sont sur des parcours différents. ✗             |

### S-V agreement, past participles

Are the agreement marks of the flagged participles the correct ones? (Past participle placed after auxiliary AVOIR agrees with verb object iff object precedes auxiliary. Otherwise participle is in masculine singular form).

|     |        |                                                                      |
|-----|--------|----------------------------------------------------------------------|
| S5a | Source | The woman who <b>saw</b> a mouse in the corridor is charming.        |
|     | Ref    | La femme qui a <b>vu</b> une souris dans le couloir est charmante.   |
|     | PBMT-1 | La femme qui a vu une souris dans le couloir est charmante. ✓        |
|     | NMT    | La femme qui a vu une souris dans le couloir est charmante. ✓        |
|     | Google | La femme qui a vu une souris dans le couloir est charmante. ✓        |
| S5b | Source | The woman that your brother <b>saw</b> in the corridor is charming.  |
|     | Ref    | La femme que votre frère a <b>vue</b> dans le couloir est charmante. |
|     | PBMT-1 | La femme que ton frère a vu dans le couloir est charmante. ✗         |
|     | NMT    | La femme que votre frère a vu dans le couloir est charmante. ✗       |
|     | Google | La femme que votre frère a vue dans le couloir est charmante. ✓      |
| S5c | Source | The house that John has <b>visited</b> is crumbling.                 |
|     | Ref    | La maison que John a <b>visitée</b> tombe en ruines.                 |
|     | PBMT-1 | La maison que John a visité est en train de s'écrouler. ✗            |
|     | NMT    | La maison que John a visitée est en train de s'effondrer. ✓          |
|     | Google | La maison que John a visité est en ruine. ✗                          |
| S5d | Source | John sold the car that he had <b>won</b> in a lottery.               |
|     | Ref    | John a vendu la voiture qu'il avait <b>gagnée</b> dans une loterie.  |
|     | PBMT-1 | John a vendu la voiture qu'il avait gagné à la loterie. ✗            |
|     | NMT    | John a vendu la voiture qu'il avait gagnée dans une loterie. ✓       |
|     | Google | John a vendu la voiture qu'il avait gagnée dans une loterie. ✓       |

### Subjunctive mood

Is the flagged verb in the correct mood? (Certain triggering verbs, adjectives or subordinate conjunctions, induce the subjunctive mood in the subordinate clause that they govern).

|     |        |                                                        |
|-----|--------|--------------------------------------------------------|
| S6a | Source | He will come provided that you <b>come</b> too.        |
|     | Ref    | Il viendra à condition que vous <b>veniez</b> aussi.   |
|     | PBMT-1 | Il viendra à condition que vous venez aussi. ✗         |
|     | NMT    | Il viendra lui aussi que vous le faites. ✗             |
|     | Google | Il viendra à condition que vous venez aussi. ✗         |
| S6b | Source | It is unfortunate that he is not <b>coming</b> either. |
|     | Ref    | Il est malheureux qu'il ne <b>vienne</b> pas non plus. |
|     | PBMT-1 | Il est regrettable qu'il n'est pas non plus à venir. ✗ |
|     | NMT    | Il est regrettable qu'il ne soit pas non plus. ✗       |
|     | Google | Il est malheureux qu'il ne vienne pas non plus. ✓      |

|     |        |                                                              |
|-----|--------|--------------------------------------------------------------|
| S6c | Source | I requested that families not <b>be</b> separated.           |
|     | Ref    | J'ai demandé que les familles ne <b>soient</b> pas séparées. |
|     | PBMT-1 | J'ai demandé que les familles ne soient pas séparées. ✓      |
|     | NMT    | J'ai demandé que les familles ne soient pas séparées. ✓      |
|     | Google | J'ai demandé que les familles ne soient pas séparées. ✓      |

## Lexico-Syntactic

### Argument switch

Are the experiencer and the object of the “missing” situation correctly preserved in the French translation? (Argument switch).

|     |        |                                                            |
|-----|--------|------------------------------------------------------------|
| S7a | Source | <b>Mary</b> sorely misses <b>Jim</b> .                     |
|     | Ref    | <b>Jim</b> manque cruellement à <b>Mary</b> .              |
|     | PBMT-1 | Marie manque cruellement de Jim. ✗                         |
|     | NMT    | Mary a lamentablement manqué de Jim. ✗                     |
|     | Google | Mary manque cruellement à Jim. ✗                           |
| S7b | Source | <b>My sister</b> is really missing <b>New York</b> .       |
|     | Ref    | <b>New York</b> manque beaucoup à <b>ma sœur</b> .         |
|     | PBMT-1 | Ma sœur est vraiment absent de New York. ✗                 |
|     | NMT    | Ma sœur est vraiment manquante à New York. ✗               |
|     | Google | Ma sœur manque vraiment New York. ✗                        |
| S7c | Source | What <b>he</b> misses most is <b>his dog</b> .             |
|     | Ref    | Ce qui <b>lui</b> manque le plus, c'est <b>son chien</b> . |
|     | PBMT-1 | Ce qu'il manque le plus, c'est son chien. ✗                |
|     | NMT    | Ce qu'il manque le plus, c'est son chien. ✗                |
|     | Google | Ce qu'il manque le plus, c'est son chien. ✗                |

### Double-object verbs

Are “gift” and “recipient” arguments correctly rendered in French? (English double-object constructions)

|     |        |                                                                |
|-----|--------|----------------------------------------------------------------|
| S8a | Source | John gave <b>his wonderful wife</b> a nice present.            |
|     | Ref    | John a donné un beau présent à <b>sa merveilleuse épouse</b> . |
|     | PBMT-1 | John a donné sa merveilleuse femme un beau cadeau. ✗           |
|     | NMT    | John a donné à sa merveilleuse femme un beau cadeau. ✓         |
|     | Google | John a donné à son épouse merveilleuse un présent gentil. ✓    |
| S8b | Source | John told <b>the kids</b> a nice story.                        |
|     | Ref    | John a raconté une belle histoire <b>aux enfants</b> .         |
|     | PBMT-1 | John a dit aux enfants une belle histoire. ✓                   |
|     | NMT    | John a dit aux enfants une belle histoire. ✓                   |
|     | Google | John a raconté aux enfants une belle histoire. ✓               |
| S8c | Source | John sent <b>his mother</b> a nice postcard.                   |
|     | Ref    | John a envoyé une belle carte postale à <b>sa mère</b> .       |
|     | PBMT-1 | John a envoyé sa mère une carte postale de nice. ✗             |
|     | NMT    | John a envoyé sa mère une carte postale de nice. ✗             |
|     | Google | John envoya à sa mère une belle carte postale. ✓               |

### Fail to

Is the meaning of “fail to” correctly rendered in the French translation?

|     |        |                                                                                |
|-----|--------|--------------------------------------------------------------------------------|
| S9a | Source | John <b>failed to</b> see the relevance of this point.                         |
|     | Ref    | John <b>n’a pas</b> vu la pertinence de ce point.                              |
|     | PBMT-1 | John a omis de voir la pertinence de ce point. ✗                               |
|     | NMT    | John n’a pas vu la pertinence de ce point. ✓                                   |
|     | Google | John a omis de voir la pertinence de ce point. ✗                               |
| S9b | Source | He failed to respond.                                                          |
|     | Ref    | Il <b>n’a pas répondu</b> .                                                    |
|     | PBMT-1 | Il n’a pas réussi à répondre. ✓                                                |
|     | NMT    | Il n’a pas répondu. ✓                                                          |
|     | Google | Il n’a pas répondu. ✓                                                          |
| S9c | Source | Those who fail to comply with this requirement will be penalized.              |
|     | Ref    | Ceux qui <b>ne</b> se conforment <b>pas</b> à cette exigence seront pénalisés. |
|     | PBMT-1 | Ceux qui ne se conforment pas à cette obligation seront pénalisés. ✓           |
|     | NMT    | Ceux qui ne se conforment pas à cette obligation seront pénalisés. ✓           |
|     | Google | Ceux qui ne respectent pas cette exigence seront pénalisés. ✓                  |

### Manner-of-movement verbs

Is the movement action expressed in the English source correctly rendered in French? (Manner-of-movement verbs with path argument may need to be rephrased in French).

|      |        |                                                              |
|------|--------|--------------------------------------------------------------|
| S10a | Source | John would like to <b>swim across</b> the river.             |
|      | Ref    | John aimerait <b>traverser</b> la rivière <b>à la nage</b> . |
|      | PBMT-1 | John aimerait nager dans la rivière. ✗                       |
|      | NMT    | John aimerait nager à travers la rivière. ✗                  |
|      | Google | John aimerait nager à travers la rivière. ✗                  |
| S10b | Source | They <b>ran into</b> the room.                               |
|      | Ref    | Ils <b>sont entrés</b> dans la chambre <b>à la course</b> .  |
|      | PBMT-1 | Ils ont couru dans la chambre. ✗                             |
|      | NMT    | Ils ont couru dans la pièce. ✗                               |
|      | Google | Ils coururent dans la pièce. ✗                               |
| S10c | Source | The man <b>ran out of</b> the park.                          |
|      | Ref    | L’homme <b>est sorti du</b> parc <b>en courant</b> .         |
|      | PBMT-1 | L’homme a manqué du parc. ✗                                  |
|      | NMT    | L’homme s’enfuit du parc. ✗                                  |
|      | Google | L’homme sortit du parc. ✗                                    |

Hard example featuring spontaneous noun-to-verb derivation (“nonce verb”).

|      |        |                                                                                |
|------|--------|--------------------------------------------------------------------------------|
| S10d | Source | John <b>guitared his way</b> to San Francisco.                                 |
|      | Ref    | John <b>s’est rendu</b> jusqu’à San Francisco <b>en jouant de la guitare</b> . |
|      | PBMT-1 | John guitared son chemin à San Francisco. ✗                                    |
|      | NMT    | John guitared sa route à San Francisco. ✗                                      |
|      | Google | John a guitaté son chemin à San Francisco. ✗                                   |

### Overlapping subcat frames

Is the French verb for “know” correctly chosen? (Choice between “savoir”/“connaître” depends on syntactic nature of its object)

|      |        |                                                             |
|------|--------|-------------------------------------------------------------|
| S11a | Source | Paul <b>knows</b> that this is a fact.                      |
|      | Ref    | Paul <b>sait que</b> c’est un fait.                         |
|      | PBMT-1 | Paul sait que c’est un fait. ✓                              |
|      | NMT    | Paul sait que c’est un fait. ✓                              |
|      | Google | Paul sait que c’est un fait. ✓                              |
| S11b | Source | Paul <b>knows</b> this story.                               |
|      | Ref    | Paul <b>connaît</b> cette histoire.                         |
|      | PBMT-1 | Paul connaît cette histoire. ✓                              |
|      | NMT    | Paul connaît cette histoire. ✓                              |
|      | Google | Paul connaît cette histoire. ✓                              |
| S11c | Source | Paul <b>knows</b> this story is hard to believe.            |
|      | Ref    | Paul <b>sait que</b> cette histoire est difficile à croire. |
|      | PBMT-1 | Paul connaît cette histoire est difficile à croire. ✗       |
|      | NMT    | Paul sait que cette histoire est difficile à croire. ✓      |
|      | Google | Paul sait que cette histoire est difficile à croire. ✓      |
| S11d | Source | He <b>knows</b> my sister will not take it.                 |
|      | Ref    | Il <b>sait que</b> ma sœur ne le prendra pas.               |
|      | PBMT-1 | Il sait que ma sœur ne prendra pas. ✓                       |
|      | NMT    | Il sait que ma sœur ne le prendra pas. ✓                    |
|      | Google | Il sait que ma sœur ne le prendra pas. ✓                    |
| S11e | Source | My sister <b>knows</b> your son is reliable.                |
|      | Ref    | Ma sœur <b>sait que</b> votre fils est fiable.              |
|      | PBMT-1 | Ma sœur connaît votre fils est fiable. ✗                    |
|      | NMT    | Ma sœur sait que votre fils est fiable. ✓                   |
|      | Google | Ma sœur sait que votre fils est fiable. ✓                   |

### NP to VP

Is the English “NP to VP” complement correctly rendered in the French translation? (Sometimes one needs to translate this structure as a finite clause).

|      |        |                                                           |
|------|--------|-----------------------------------------------------------|
| S12a | Source | John believes <b>Bill to be dishonest</b> .               |
|      | Ref    | John croit <b>que Bill est malhonnête</b> .               |
|      | PBMT-1 | John estime que le projet de loi soit malhonnête. ✓       |
|      | NMT    | John croit que le projet de loi est malhonnête. ✓         |
|      | Google | John croit que Bill est malhonnête. ✓                     |
| S12b | Source | He liked <b>his father to tell him stories</b> .          |
|      | Ref    | Il aimait <b>que son père lui raconte des histoires</b> . |
|      | PBMT-1 | Il aimait son père pour lui raconter des histoires. ✗     |
|      | NMT    | Il aimait son père pour lui raconter des histoires. ✗     |
|      | Google | Il aimait son père à lui raconter des histoires. ✗        |



|      |        |                                                    |
|------|--------|----------------------------------------------------|
| S12c | Source | She wanted <b>her mother to let her go</b> .       |
|      | Ref    | Elle voulait <b>que sa mère la laisse partir</b> . |
|      | PBMT-1 | Elle voulait que sa mère de lui laisser aller. ✗   |
|      | NMT    | Elle voulait que sa mère la laisse faire. ✓        |
|      | Google | Elle voulait que sa mère la laisse partir. ✓       |

### Factitives

Is the English verb correctly rendered in the French translation? (Agentive use of some French verbs require embedding under “faire”).

|      |        |                                              |
|------|--------|----------------------------------------------|
| S13a | Source | John <b>cooked</b> a big chicken.            |
|      | Ref    | John a <b>fait cuire</b> un gros poulet.     |
|      | PBMT-1 | John cuit un gros poulet. ✗                  |
|      | NMT    | John cuit un gros poulet. ✗                  |
|      | Google | John a fait cuire un gros poulet. ✓          |
| S13b | Source | John <b>melted</b> a lot of ice.             |
|      | Ref    | John a <b>fait fondre</b> beaucoup de glace. |
|      | PBMT-1 | John fondu a lot of ice. ✗                   |
|      | NMT    | John a fondu beaucoup de glace. ✗            |
|      | Google | John a fondu beaucoup de glace. ✗            |
| S13c | Source | She likes to <b>grow</b> flowers.            |
|      | Ref    | Elle aime <b>faire pousser</b> des fleurs.   |
|      | PBMT-1 | Elle aime à se développer des fleurs. ✗      |
|      | NMT    | Elle aime à cultiver des fleurs. ✓           |
|      | Google | Elle aime faire pousser des fleurs. ✓        |

### Noun Compounds

Is the English nominal compound rendered with the right preposition in the French translation?

|      |        |                                      |
|------|--------|--------------------------------------|
| S14a | Source | Use the meat knife.                  |
|      | Ref    | Utilisez le couteau <b>à</b> viande. |
|      | PBMT-1 | Utilisez le couteau de viande. ✗     |
|      | NMT    | Utilisez le couteau à viande. ✓      |
|      | Google | Utilisez le couteau à viande. ✓      |
| S14b | Source | Use the butter knife.                |
|      | Ref    | Utilisez le couteau <b>à</b> beurre. |
|      | PBMT-1 | Utilisez le couteau à beurre. ✓      |
|      | NMT    | Utilisez le couteau au beurre. ✗     |
|      | Google | Utilisez le couteau à beurre. ✓      |
| S14c | Source | Use the steak knife.                 |
|      | Ref    | Utilisez le couteau <b>à</b> steak.  |
|      | PBMT-1 | Utilisez le steak couteau. ✗         |
|      | NMT    | Utilisez le couteau à steak. ✓       |
|      | Google | Utilisez le couteau de steak. ✗      |

|      |        |                                      |
|------|--------|--------------------------------------|
| S14d | Source | Clean the water filter.              |
|      | Ref    | Nettoyez le filtre <b>à</b> eau.     |
|      | PBMT-1 | Nettoyez le filtre à eau. ✓          |
|      | NMT    | Nettoyez le filtre à eau. ✓          |
|      | Google | Nettoyez le filtre à eau. ✓          |
| S14e | Source | Clean the juice filter.              |
|      | Ref    | Nettoyez le filtre <b>à</b> jus.     |
|      | PBMT-1 | Nettoyez le filtre de jus. ✗         |
|      | NMT    | Nettoyez le filtre de jus. ✗         |
|      | Google | Nettoyez le filtre à jus. ✓          |
| S14f | Source | Clean the tea filter.                |
|      | Ref    | Nettoyez le filtre <b>à</b> thé.     |
|      | PBMT-1 | Nettoyez le filtre à thé. ✓          |
|      | NMT    | Nettoyez le filtre de thé. ✗         |
|      | Google | Nettoyez le filtre à thé. ✓          |
| S14g | Source | Clean the cloth filter.              |
|      | Ref    | Nettoyez le filtre <b>en</b> tissu.  |
|      | PBMT-1 | Nettoyez le filtre en tissu. ✓       |
|      | NMT    | Nettoyez le filtre en tissu. ✓       |
|      | Google | Nettoyez le filtre en tissu. ✓       |
| S14h | Source | Clean the metal filter.              |
|      | Ref    | Nettoyez le filtre <b>en</b> métal.  |
|      | PBMT-1 | Nettoyez le filtre en métal. ✓       |
|      | NMT    | Nettoyez le filtre en métal. ✓       |
|      | Google | Nettoyez le filtre métallique. ✓     |
| S14i | Source | Clean the paper filter.              |
|      | Ref    | Nettoyez le filtre <b>en</b> papier. |
|      | PBMT-1 | Nettoyez le filtre en papier. ✓      |
|      | NMT    | Nettoyez le filtre en papier. ✓      |
|      | Google | Nettoyez le filtre à papier. ✗       |

### Common idioms

Is the English idiomatic expression correctly rendered with a suitable French idiomatic expression?

|      |        |                                           |
|------|--------|-------------------------------------------|
| S15a | Source | Stop <b>beating around the bush</b> .     |
|      | Ref    | Cessez de <b>tourner autour du pot</b> .  |
|      | PBMT-1 | Cesser de battre la campagne. ✗           |
|      | NMT    | Arrêtez de battre autour de la brousse. ✗ |
|      | Google | Arrêter de tourner autour du pot. ✓       |

|      |        |                                                                                       |
|------|--------|---------------------------------------------------------------------------------------|
| S15b | Source | You are <b>putting the cart before the horse</b> .                                    |
|      | Ref    | Vous <b>mettez la charrue devant les bœufs</b> .                                      |
|      | PBMT-1 | Vous pouvez mettre la charrue avant les bœufs. ✓                                      |
|      | NMT    | Vous mettez la charrue avant le cheval. ✗                                             |
|      | Google | Vous mettez le chariot devant le cheval. ✗                                            |
| S15c | Source | His comment proved to be <b>the straw that broke the camel's back</b> .               |
|      | Ref    | Son commentaire s'est avéré être <b>la goutte d'eau qui a fait déborder le vase</b> . |
|      | PBMT-1 | Son commentaire s'est révélé être la goutte d'eau qui fait déborder le vase. ✓        |
|      | NMT    | Son commentaire s'est avéré être la paille qui a brisé le dos du chameau. ✗           |
|      | Google | Son commentaire s'est avéré être la paille qui a cassé le dos du chameau. ✗           |
| S15d | Source | His argument really <b>hit the nail on the head</b> .                                 |
|      | Ref    | Son argument a vraiment <b>fait mouche</b> .                                          |
|      | PBMT-1 | Son argument a vraiment mis le doigt dessus. ✓                                        |
|      | NMT    | Son argument a vraiment frappé le clou sur la tête. ✗                                 |
|      | Google | Son argument a vraiment frappé le clou sur la tête. ✗                                 |
| S15e | Source | It's <b>no use crying over spilt milk</b> .                                           |
|      | Ref    | <b>Ce qui est fait est fait</b> .                                                     |
|      | PBMT-1 | Ce n'est pas de pleurer sur le lait répandu. ✗                                        |
|      | NMT    | Il ne sert à rien de pleurer sur le lait haché. ✗                                     |
|      | Google | Ce qui est fait est fait. ✓                                                           |
| S15f | Source | It is <b>no use crying over spilt milk</b> .                                          |
|      | Ref    | <b>Ce qui est fait est fait</b> .                                                     |
|      | PBMT-1 | Il ne suffit pas de pleurer sur le lait répandu. ✗                                    |
|      | NMT    | Il ne sert à rien de pleurer sur le lait écrémé. ✗                                    |
|      | Google | Il est inutile de pleurer sur le lait répandu. ✗                                      |

### Syntactically flexible idioms

|                                                                                                     |        |                                                                |
|-----------------------------------------------------------------------------------------------------|--------|----------------------------------------------------------------|
| Is the English idiomatic expression correctly rendered with a suitable French idiomatic expression? |        |                                                                |
| S16a                                                                                                | Source | The cart has been put before the horse.                        |
|                                                                                                     | Ref    | La <b>charrue a été mise devant les bœufs</b> .                |
|                                                                                                     | PBMT-1 | On met la charrue devant le cheval. ✗                          |
|                                                                                                     | NMT    | Le chariot a été mis avant le cheval. ✗                        |
|                                                                                                     | Google | Le chariot a été mis devant le cheval. ✗                       |
| S16b                                                                                                | Source | With this argument, <b>the nail has been hit on the head</b> . |
|                                                                                                     | Ref    | Avec cet argument, <b>la cause est entendue</b> .              |
|                                                                                                     | PBMT-1 | Avec cette argument, l'ongle a été frappée à la tête. ✗        |
|                                                                                                     | NMT    | Avec cet argument, l'ongle a été touché à la tête. ✗           |
|                                                                                                     | Google | Avec cet argument, le clou a été frappé sur la tête. ✗         |

## Syntactic

### Yes-no question syntax

Is the English question correctly rendered as a French question?

|      |        |                                                              |
|------|--------|--------------------------------------------------------------|
| S17a | Source | <b>Have the kids</b> ever watched that movie?                |
|      | Ref    | <b>Les enfants ont-ils</b> déjà vu ce film?                  |
|      | PBMT-1 | Les enfants jamais regardé ce film? ✗                        |
|      | NMT    | Les enfants ont-ils déjà regardé ce film? ✓                  |
|      | Google | Les enfants ont-ils déjà regardé ce film? ✓                  |
| S17b | Source | <b>Hasn't your boss denied you</b> a promotion?              |
|      | Ref    | <b>Votre patron ne vous a-t-il pas refusé</b> une promotion? |
|      | PBMT-1 | N'a pas nié votre patron vous un promotion? ✗                |
|      | NMT    | Est-ce que votre patron vous a refusé une promotion? ✓       |
|      | Google | Votre patron ne vous a-t-il pas refusé une promotion? ✓      |
| S17c | Source | <b>Shouldn't I attend</b> this meeting?                      |
|      | Ref    | <b>Ne devrais-je pas assister</b> à cette réunion?           |
|      | PBMT-1 | Ne devrais-je pas assister à cette réunion? ✓                |
|      | NMT    | Est-ce que je ne devrais pas assister à cette réunion? ✓     |
|      | Google | Ne devrais-je pas assister à cette réunion? ✓                |

### Tag questions

Is the English "tag question" element correctly rendered in the translation?

|      |        |                                                                   |
|------|--------|-------------------------------------------------------------------|
| S18a | Source | Mary looked really happy tonight, <b>didn't she</b> ?             |
|      | Ref    | Mary avait l'air vraiment heureuse ce soir, <b>n'est-ce pas</b> ? |
|      | PBMT-1 | Marie a regardé vraiment heureux de ce soir, n'est-ce pas elle? ✗ |
|      | NMT    | Mary s'est montrée vraiment heureuse ce soir, ne l'a pas fait? ✗  |
|      | Google | Mary avait l'air vraiment heureuse ce soir, n'est-ce pas? ✓       |
| S18b | Source | We should not do that again, <b>should we</b> ?                   |
|      | Ref    | Nous ne devrions pas refaire cela, <b>n'est-ce pas</b> ?          |
|      | PBMT-1 | Nous ne devrions pas faire qu'une fois encore, faut-il? ✗         |
|      | NMT    | Nous ne devrions pas le faire encore, si nous? ✗                  |
|      | Google | Nous ne devrions pas recommencer, n'est-ce pas? ✓                 |
| S18c | Source | She was perfect tonight, <b>was she not</b> ?                     |
|      | Ref    | Elle était parfaite ce soir, <b>n'est-ce pas</b> ?                |
|      | PBMT-1 | Elle était parfait ce soir, elle n'était pas? ✗                   |
|      | NMT    | Elle était parfaite ce soir, n'était-elle pas? ✗                  |
|      | Google | Elle était parfaite ce soir, n'est-ce pas? ✓                      |

### WH-MVT and stranded preps

Is the dangling preposition of the English sentence correctly placed in the French translation?

|      |        |                                                               |
|------|--------|---------------------------------------------------------------|
| S19a | Source | The guy <b>that</b> she is going out <b>with</b> is handsome. |
|      | Ref    | Le type <b>avec qui</b> elle sort est beau.                   |
|      | PBMT-1 | Le mec qu'elle va sortir avec est beau. ✗                     |
|      | NMT    | Le mec qu'elle sort avec est beau. ✗                          |
|      | Google | Le mec avec qui elle sort est beau. ✓                         |

|      |        |                                                                 |
|------|--------|-----------------------------------------------------------------|
| S19b | Source | <b>Whom</b> is she going out <b>with</b> these days?            |
|      | Ref    | <b>Avec qui</b> sort-elle ces jours-ci?                         |
|      | PBMT-1 | Qu'est-ce qu'elle allait sortir avec ces jours? ✗               |
|      | NMT    | À qui s'adresse ces jours-ci? ✗                                 |
|      | Google | Avec qui sort-elle de nos jours? ✓                              |
| S19c | Source | The girl <b>that</b> he has been talking <b>about</b> is smart. |
|      | Ref    | La fille <b>dont</b> il a parlé est brillante.                  |
|      | PBMT-1 | La jeune fille qu'il a parlé est intelligent. ✗                 |
|      | NMT    | La fille qu'il a parlé est intelligente. ✗                      |
|      | Google | La fille dont il a parlé est intelligente. ✓                    |
| S19d | Source | <b>Who</b> was he talking <b>to</b> when you left?              |
|      | Ref    | À <b>qui</b> parlait-il au moment où tu est parti?              |
|      | PBMT-1 | Qui est lui parler quand vous avez quitté? ✗                    |
|      | NMT    | Qui a-t-il parlé à quand vous avez quitté? ✗                    |
|      | Google | Avec qui il parlait quand vous êtes parti? ✓                    |
| S19e | Source | The city <b>that</b> he is arriving <b>from</b> is dangerous.   |
|      | Ref    | La ville <b>d'où</b> il arrive est dangereuse.                  |
|      | PBMT-1 | La ville qu'il est arrivé de est dangereuse. ✗                  |
|      | NMT    | La ville qu'il est en train d'arriver est dangereuse. ✗         |
|      | Google | La ville d'où il vient est dangereuse. ✓                        |
| S19f | Source | <b>Where</b> is he arriving <b>from</b> ?                       |
|      | Ref    | <b>D'où</b> arrive-t-il?                                        |
|      | PBMT-1 | Où est-il arrivé? ✗                                             |
|      | NMT    | De quoi s'agit-il? ✗                                            |
|      | Google | D'où vient-il? ✓                                                |

### Adverb-triggered inversion

Is the adverb-triggered subject-verb inversion in the English sentence correctly rendered in the French translation?

|      |        |                                                          |
|------|--------|----------------------------------------------------------|
| S20a | Source | Rarely <b>did the dog</b> run.                           |
|      | Ref    | Rarement <b>le chien courait-il</b> .                    |
|      | PBMT-1 | Rarement le chien courir. ✗                              |
|      | NMT    | Il est rare que le chien marche. ✗                       |
|      | Google | Rarement le chien courir. ✗                              |
| S20b | Source | Never before <b>had she been</b> so unhappy.             |
|      | Ref    | Jamais encore <b>n'avait-elle</b> été aussi malheureuse. |
|      | PBMT-1 | Jamais auparavant, si elle avait été si malheureux. ✗    |
|      | NMT    | Jamais auparavant n'avait été si malheureuse. ✗          |
|      | Google | Jamais elle n'avait été aussi malheureuse. ✓             |

|      |        |                                                     |
|------|--------|-----------------------------------------------------|
| S20c | Source | Nowhere <b>were the birds</b> so colorful.          |
|      | Ref    | Nulle part <b>les oiseaux n'étaient</b> si colorés. |
|      | PBMT-1 | Nulle part les oiseaux de façon colorée. ✗          |
|      | NMT    | Les oiseaux ne sont pas si colorés. ✗               |
|      | Google | Nulle part les oiseaux étaient si colorés. ✗        |

### Middle voice

Is the generic statement made in the English sentence correctly and naturally rendered in the French translation?

|      |        |                                                            |
|------|--------|------------------------------------------------------------|
| S21a | Source | Soup <b>is eaten</b> with a large spoon.                   |
|      | Ref    | La soupe <b>se mange</b> avec une grande cuillère          |
|      | PBMT-1 | La soupe est mangé avec une grande cuillère. ✗             |
|      | NMT    | La soupe est consommée avec une grosse cuillère. ✗         |
|      | Google | La soupe est consommée avec une grande cuillère. ✗         |
| S21b | Source | Masonry <b>is cut</b> using a diamond blade.               |
|      | Ref    | La maçonnerie <b>se coupe</b> avec une lame à diamant.     |
|      | PBMT-1 | La maçonnerie est coupé à l'aide d'une lame de diamant. ✗  |
|      | NMT    | La maçonnerie est coupée à l'aide d'une lame de diamant. ✗ |
|      | Google | La maçonnerie est coupée à l'aide d'une lame de diamant. ✗ |
| S21c | Source | Champagne <b>is drunk</b> in a glass called a flute.       |
|      | Ref    | Le champagne <b>se boit</b> dans un verre appelé flute.    |
|      | PBMT-1 | Le champagne est ivre dans un verre appelé une flute. ✗    |
|      | NMT    | Le champagne est ivre dans un verre appelé flute. ✗        |
|      | Google | Le Champagne est bu dans un verre appelé flute. ✗          |

### Fronted "should"

Fronted "should" is interpreted as a conditional subordinator. It is normally translated as "si" with imperfect tense.

|      |        |                                                                                   |
|------|--------|-----------------------------------------------------------------------------------|
| S22a | Source | <b>Should</b> Paul leave, I would be sad.                                         |
|      | Ref    | <b>Si</b> Paul <b>devait</b> s'en aller, je serais triste.                        |
|      | PBMT-1 | Si le congé de Paul, je serais triste. ✗                                          |
|      | NMT    | Si Paul quitte, je serais triste. ✗                                               |
|      | Google | Si Paul s'en allait, je serais triste. ✓                                          |
| S22b | Source | Should he become president, she would be promoted immediately.                    |
|      | Ref    | <b>S'il</b> devait devenir président, elle recevrait immédiatement une promotion. |
|      | PBMT-1 | S'il devait devenir président, elle serait encouragée immédiatement. ✓            |
|      | NMT    | S'il devait devenir président, elle serait immédiatement promue. ✓                |
|      | Google | Devrait-il devenir président, elle serait immédiatement promue. ✗                 |
| S22c | Source | <b>Should</b> he fall, he would get up again immediately.                         |
|      | Ref    | <b>S'</b> il venait à tomber, il se relèverait immédiatement.                     |
|      | PBMT-1 | S'il devait tomber, il allait se lever immédiatement de nouveau. ✓                |
|      | NMT    | S'il tombe, il serait de nouveau immédiatement. ✗                                 |
|      | Google | S'il tombe, il se lèvera immédiatement. ✗                                         |

### Clitic pronouns

Are the English pronouns correctly rendered in the French translations?

|      |        |                                                              |
|------|--------|--------------------------------------------------------------|
| S23a | Source | She had a lot of money but he did not have <b>any</b> .      |
|      | Ref    | Elle avait beaucoup d'argent mais il n' <b>en</b> avait pas. |
|      | PBMT-1 | Elle avait beaucoup d'argent mais il n'en avait pas. ✓       |
|      | NMT    | Elle avait beaucoup d'argent, mais il n'a pas eu d'argent. ✓ |
|      | Google | Elle avait beaucoup d'argent mais il n'en avait pas. ✓       |
| S23b | Source | He did not talk <b>to them</b> very often.                   |
|      | Ref    | Il ne <b>leur</b> parlait pas très souvent.                  |
|      | PBMT-1 | Il n'a pas leur parler très souvent. ✗                       |
|      | NMT    | Il ne leur a pas parlé très souvent. ✓                       |
|      | Google | Il ne leur parlait pas très souvent. ✓                       |
| S23c | Source | The men are watching <b>each other</b> .                     |
|      | Ref    | Les hommes <b>se</b> surveillent <b>l'un l'autre</b>         |
|      | PBMT-1 | Les hommes se regardent les uns les autres. ✓                |
|      | NMT    | Les hommes se regardent les uns les autres. ✓                |
|      | Google | Les hommes se regardent. ✗                                   |
| S23d | Source | He gave <b>it</b> to the man.                                |
|      | Ref    | Il <b>le</b> donna à l'homme.                                |
|      | PBMT-1 | Il a donné à l'homme. ✗                                      |
|      | NMT    | Il l'a donné à l'homme. ✓                                    |
|      | Google | Il le donna à l'homme. ✓                                     |
| S23e | Source | He did not give <b>it</b> to <b>her</b> .                    |
|      | Ref    | Il ne <b>le lui</b> a pas donné.                             |
|      | PBMT-1 | Il ne lui donner. ✗                                          |
|      | NMT    | Il ne l'a pas donné à elle. ✗                                |
|      | Google | Il ne lui a pas donné. ✗                                     |

### Ordinal placement

Is the relative order of the ordinals and numerals correct in the French translation?

|      |        |                                                         |
|------|--------|---------------------------------------------------------|
| S24a | Source | The <b>first four</b> men were exhausted.               |
|      | Ref    | Les <b>quatre premiers</b> hommes étaient tous épuisés. |
|      | PBMT-1 | Les quatre premiers hommes étaient épuisés. ✓           |
|      | NMT    | Les quatre premiers hommes ont été épuisés. ✓           |
|      | Google | Les quatre premiers hommes étaient épuisés. ✓           |
| S24b | Source | The <b>last three</b> candidates were eliminated.       |
|      | Ref    | Les <b>trois derniers</b> candidats ont été éliminés.   |
|      | PBMT-1 | Les trois derniers candidats ont été éliminés. ✓        |
|      | NMT    | Les trois derniers candidats ont été éliminés. ✓        |
|      | Google | Les trois derniers candidats ont été éliminés. ✓        |

|      |        |                                                      |
|------|--------|------------------------------------------------------|
| S24c | Source | The <b>other two</b> guys left without paying.       |
|      | Ref    | Les <b>deux autres</b> types sont partis sans payer. |
|      | PBMT-1 | Les deux autres mecs ont laissé sans payer. ✓        |
|      | NMT    | Les deux autres gars à gauche sans payer. ✓          |
|      | Google | Les deux autres gars sont partis sans payer. ✓       |

### Inalienable possession

Is the French translation correct and natural both in: a) its use of a particular determiner on the body part noun; and b) the presence or absence of a reflexive pronoun before the verb?

|      |        |                                            |
|------|--------|--------------------------------------------|
| S25a | Source | He washed <b>his</b> hands.                |
|      | Ref    | Ils <b>s'</b> est lavé <b>les</b> mains.   |
|      | PBMT-1 | Ils se lavait les mains. ✓                 |
|      | NMT    | Il a lavé ses mains. ✗                     |
|      | Google | Ils se lava les mains. ✓                   |
| S25b | Source | I brushed <b>my</b> teeth.                 |
|      | Ref    | Je <b>me</b> suis brossé <b>les</b> dents. |
|      | PBMT-1 | J'ai brossé mes dents. ✗                   |
|      | NMT    | J'ai brossé mes dents. ✗                   |
|      | Google | Je me suis brossé les dents. ✓             |
| S25c | Source | You brushed <b>your</b> teeth.             |
|      | Ref    | Tu <b>t'</b> es brossé <b>les</b> dents    |
|      | PBMT-1 | Vous avez brossé vos dents. ✗              |
|      | NMT    | vous avez brossé vos dents. ✗              |
|      | Google | Tu as brossé les dents. ✗                  |
| S25d | Source | I raised <b>my</b> hand.                   |
|      | Ref    | J'ai levé <b>la</b> main.                  |
|      | PBMT-1 | J'ai levé la main. ✓                       |
|      | NMT    | J'ai soulevé mamain. ✗                     |
|      | Google | Je levai la main. ✓                        |
| S25e | Source | He turned <b>his</b> head.                 |
|      | Ref    | Il a tourné <b>la</b> tête.                |
|      | PBMT-1 | Il a transformé sa tête. ✗                 |
|      | NMT    | Il a tourné sa tête. ✗                     |
|      | Google | Il tourna la tête. ✓                       |
| S25f | Source | He raised his eyes to heaven.              |
|      | Ref    | Il leva <b>les</b> yeux au ciel.           |
|      | PBMT-1 | Il a évoqué les yeux au ciel. ✓            |
|      | NMT    | Il a levé les yeux sur le ciel. ✓          |
|      | Google | Il leva les yeux au ciel. ✓                |



### Zero REL PRO

Is the English zero relative pronoun correctly translated as a non-zero one in the French translation?

|      |        |                                                     |
|------|--------|-----------------------------------------------------|
| S26a | Source | The strangers the woman saw were working.           |
|      | Ref    | Les inconnus <b>que</b> la femme vit travaillaient. |
|      | PBMT-1 | Les étrangers la femme vit travaillaient. ✗         |
|      | NMT    | Les inconnus de la femme ont travaillé. ✗           |
|      | Google | Les étrangers que la femme vit travaillaient. ✓     |
| S26b | Source | The man your sister hates is evil.                  |
|      | Ref    | L'homme <b>que</b> votre sœur déteste est méchant.  |
|      | PBMT-1 | L'homme ta soeur hait est le mal. ✗                 |
|      | NMT    | L'homme que ta soeur est le mal est le mal. ✓       |
|      | Google | L'homme que votre sœur hait est méchant. ✓          |
| S26c | Source | The girl my friend was talking about is gone.       |
|      | Ref    | La fille <b>dont</b> mon ami parlait est partie.    |
|      | PBMT-1 | La jeune fille mon ami a parlé a disparu. ✗         |
|      | NMT    | La petite fille de mon ami était révolue. ✗         |
|      | Google | La fille dont mon ami parlait est partie. ✓         |
